# Supplementary material for: Preparation of carbon nanofibrous mats encapsulating zero-valent Fe nanoparticles as Fe reservoir for removal of organic pollutants
Source: Royal Society of Chemistry journal article supplement (doi:10.1039/d0ra10235k), 2021-01-01
Supplement: d0ra10235k1.pdf [file d0ra10235k1.pdf]

## Electronic Supplementary Information

### Preparation of carbon nanofibrous mats encapsulating zero-valent Fe nanoparticles as Fe reservoir for removal of organic pollutants

Hao Jiang,<sup>a</sup> Yaomin Li,<sup>a</sup> Zhengnan Su,<sup>a</sup> Tiantian Zhang,<sup>a</sup> Lihui Meng,<sup>a</sup> Yanru Hu,<sup>a</sup>

Jiangling Wan,<sup>\*b</sup> Guoxi Xiong,<sup>\*c</sup> and Qingzhi Wu<sup>\*a</sup>

<sup>a</sup> State Key Laboratory of Advanced Technology for Materials Synthesis and Processing, Wuhan University of Technology, Wuhan, 430070, P. R. China

<sup>b</sup> National Engineering Research Center for Nanomedicine, College of Life Science and Technology, Huazhong University of Science and Technology, Wuhan 430074, P. R. China

<sup>c</sup> Technology Center of China Tobacco Hubei Industrial Co. Ltd., Wuhan 430040, P. R. China

\*Corresponding authors.

E-mail: [wanj1@hust.edu.cn](mailto:wanj1@hust.edu.cn); [xionggx@hbtobacco.cn](mailto:xionggx@hbtobacco.cn); [wuqzh@whut.edu.cn](mailto:wuqzh@whut.edu.cn)

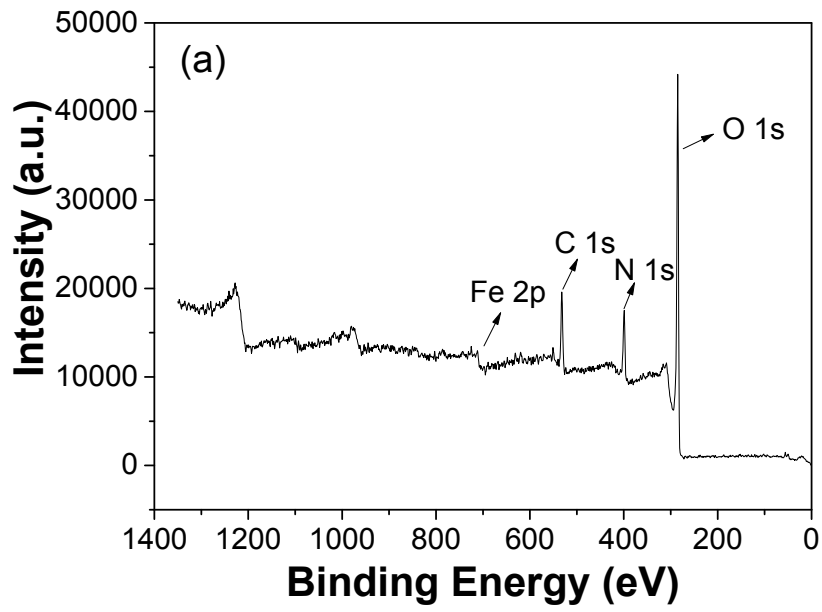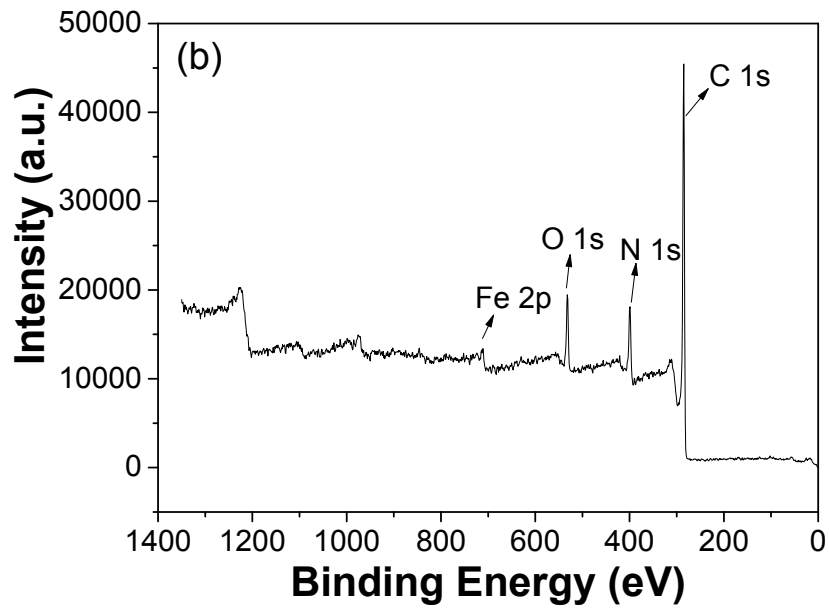

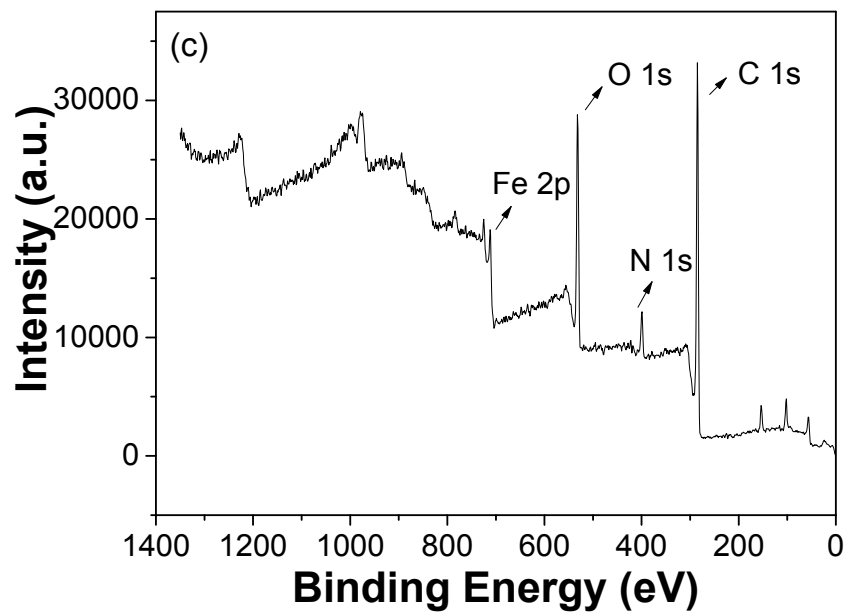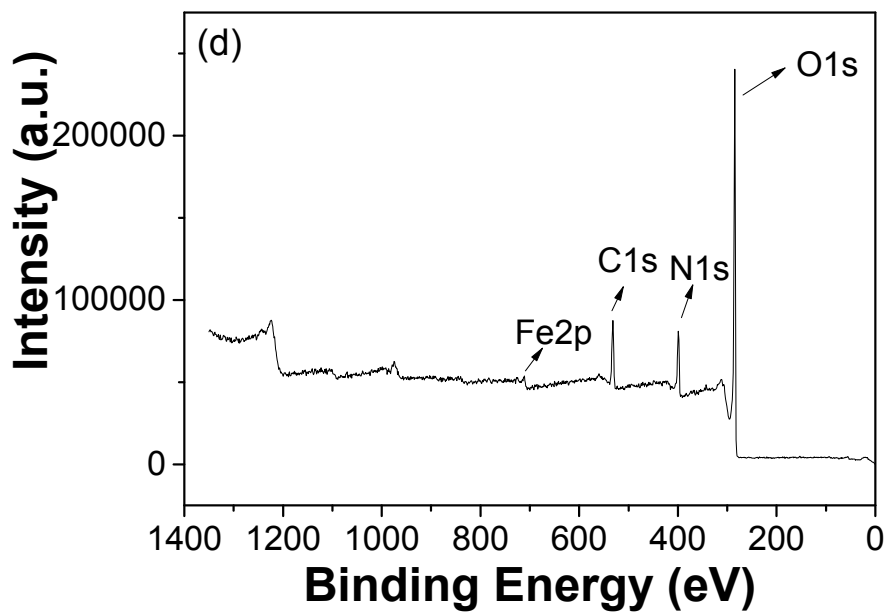

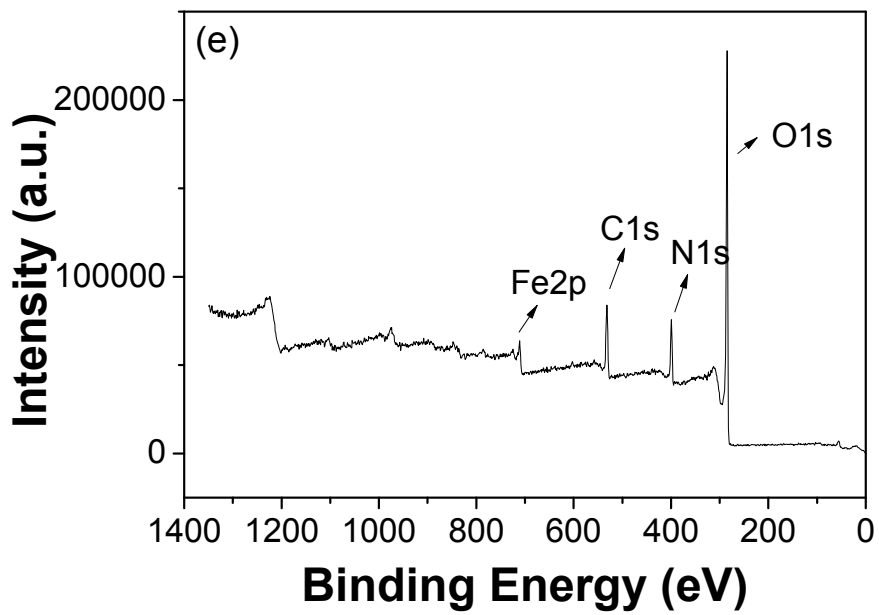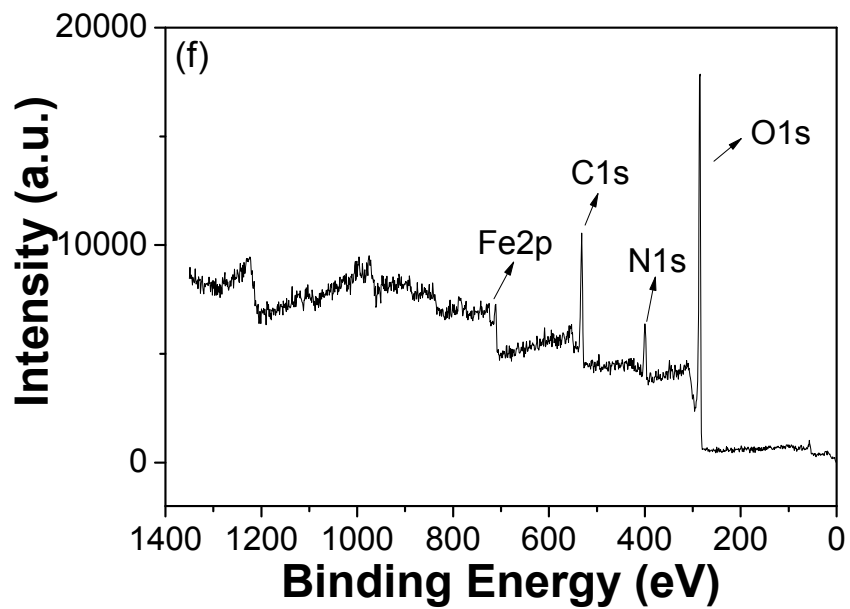

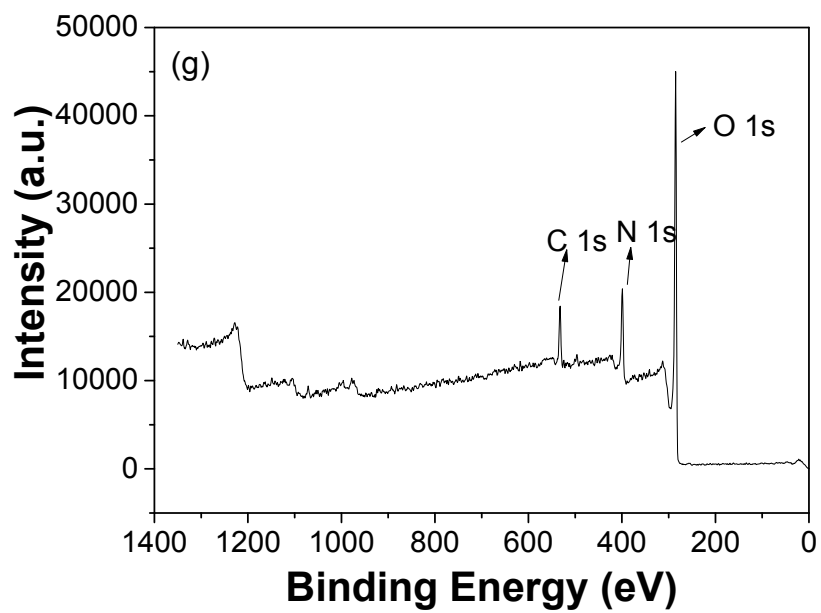

**Fig. S1** XPS spectra of as-prepared nanofibrous mats after annealing. (a) S1-a; (b) S2-a; (c) S3-a; (d) C1-a; (e) C2-a; (f) C3-a; (g) S0-a.
